# Supplementary material for: A novel route for the synthesis of alkanes from glycerol in a two step process using a Pd/SBA-15 catalyst
Source: Royal Society of Chemistry journal article supplement (doi:10.1039/c5ra10744j), 2015-01-01
Supplement: c5ra10744j1.pdf [file c5ra10744j1.pdf]

## Electronic Supplementary Information

### A novel route synthesis of alkanes from glycerol in two step process using Pd/SBA-15 catalyst

V. Udayakumar<sup>a</sup>, A. Pandurangan<sup>a,\*</sup>

<sup>a</sup>Department of Chemistry, Anna University, Guindy, Chennai 600 025, India

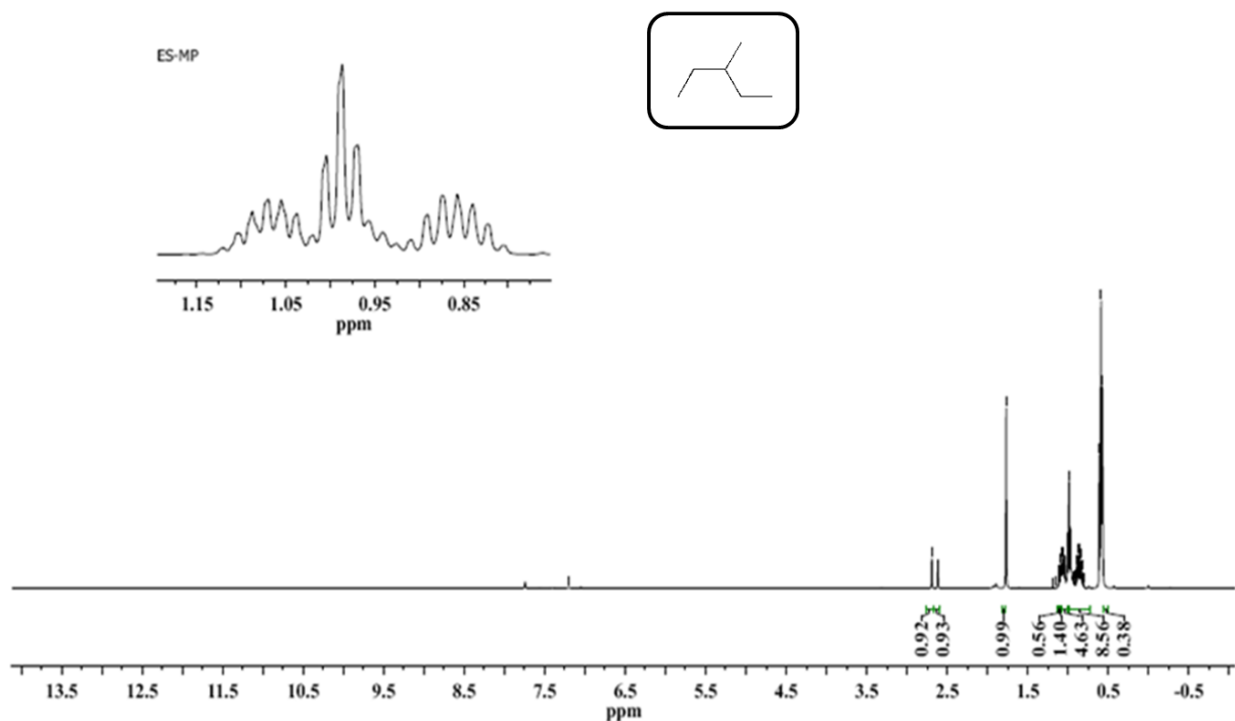

**Fig. S1.** <sup>1</sup>H NMR spectra (400 MHz, CDCl<sub>3</sub>) of 3-methylpentane.

\* Corresponding author at: Department of Chemistry, Anna University, Guindy, Chennai-600 025, India.

Tel.: +91 44 22358653; fax: +91 44 22200660.

E-mail address: [pandurangan\\_a@yahoo.com](mailto:pandurangan_a@yahoo.com) (A.Pandurangan).

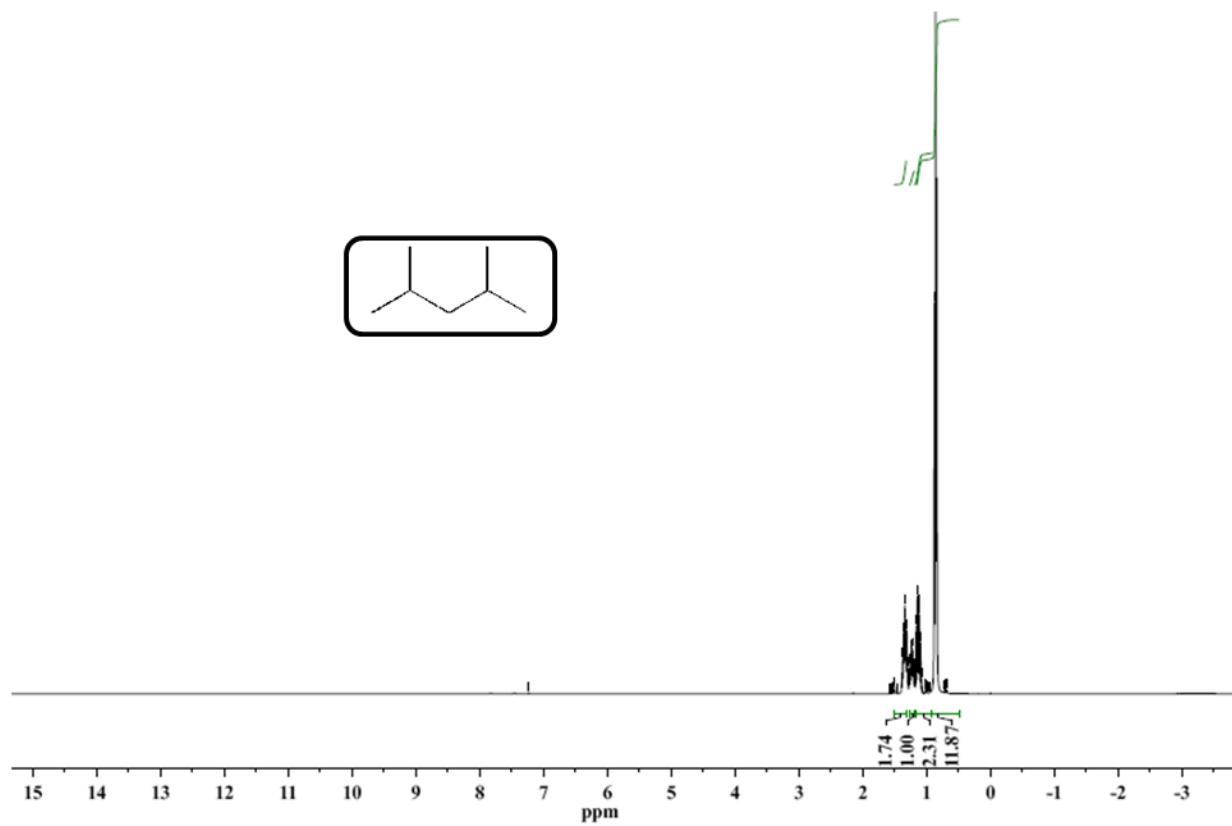

**Fig. S2.** <sup>1</sup>H NMR spectra (400 MHz, CDCl<sub>3</sub>) of 2,4-dimethylpentane.

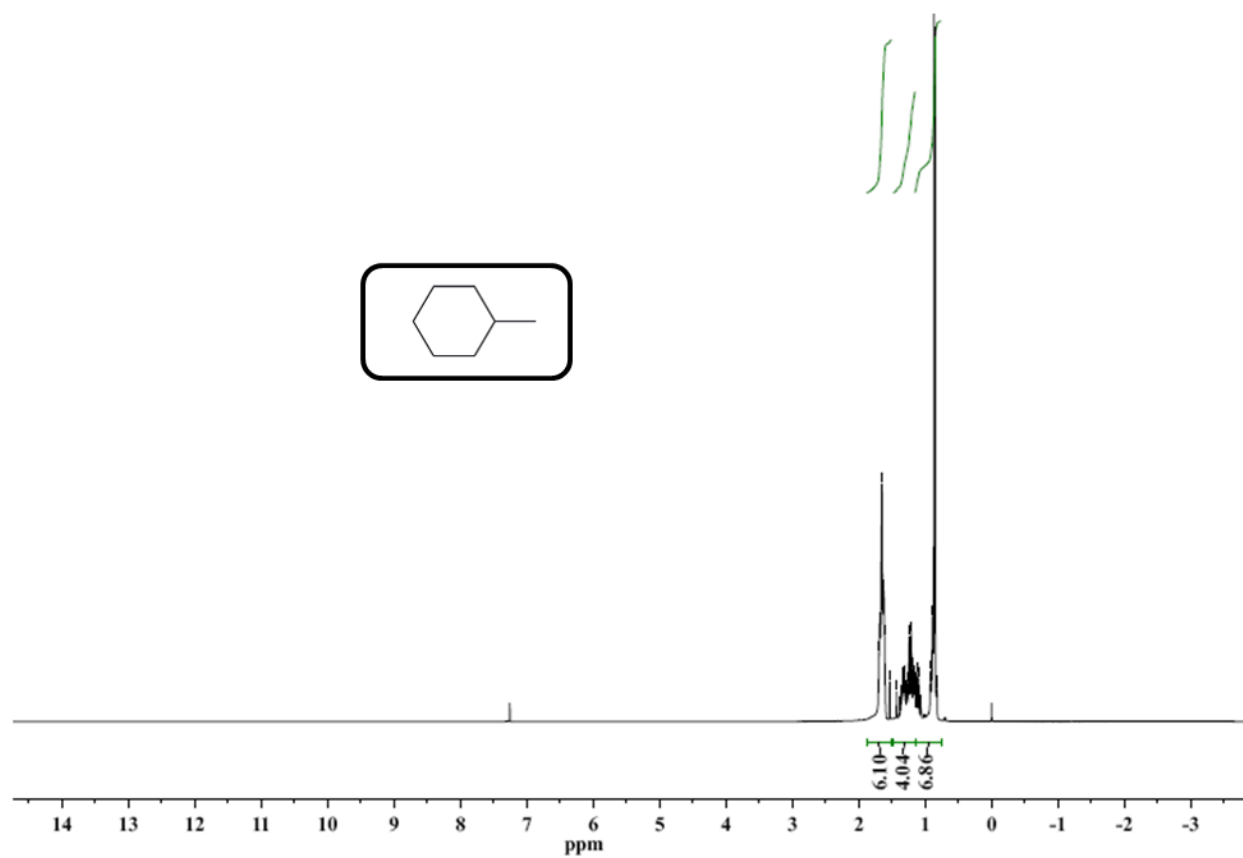

**Fig. S3.**  $^1\text{H}$  NMR spectra (400 MHz,  $\text{CDCl}_3$ ) of methylcyclohexane.

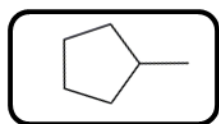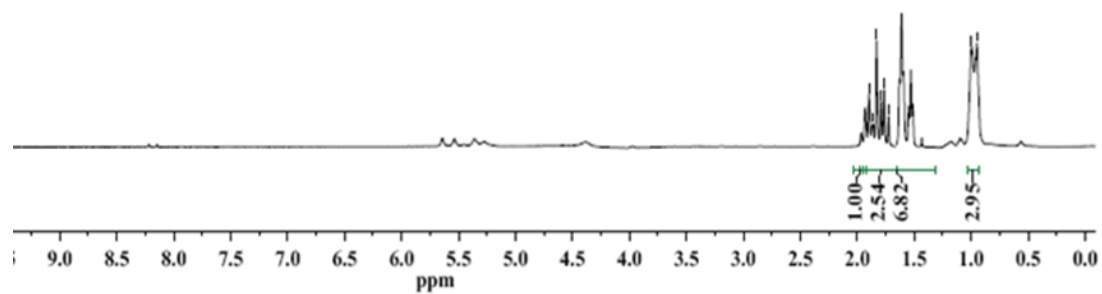

**Fig. S4.** <sup>1</sup>H NMR spectra (400 MHz, CDCl<sub>3</sub>) of methylcyclopentane.

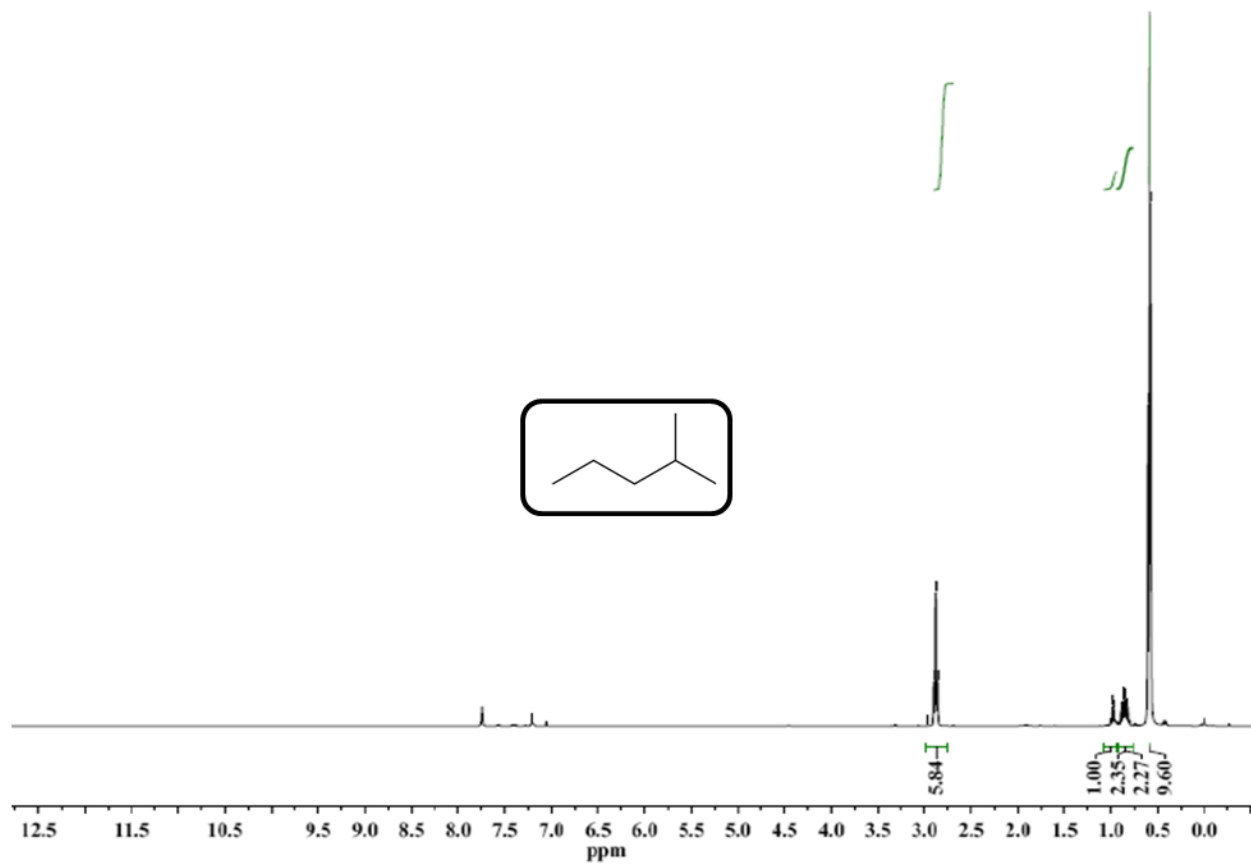

**Fig. S5.** <sup>1</sup>H NMR spectra (400 MHz, CDCl<sub>3</sub>) of 2-methylpentane.
